# Supplementary material for: A geographical cluster randomised stepped wedge study of continuing medical education and cancer diagnosis in general practice
Source: PubMed Central journal article supplement (PMC4229614; doi:10.1186/s13012-014-0159-z), 2014-11-07
Supplement: 13012_2014_159_MOESM3_ESM.pdf [file 13012_2014_159_MOESM3_ESM.pdf]

Additional file 3: One-page reminder form, used if we obtained information from register data about a patient investigated in a cancer fast-track pathway and we have not received a 1-page form from

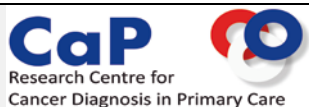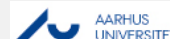

### Form on a patient investigated in a cancer fast-track pathway

From register data, we have been informed that a patient with the following personal identification number listed at your general practice has been investigated in a cancer fast-track pathway. We kindly request the referring general practitioner to complete this form.

|   |   |   |   |   |   |
|---|---|---|---|---|---|
| 1 | 1 | 1 | 1 | 1 | 1 |
|---|---|---|---|---|---|

|   |   |   |   |
|---|---|---|---|
| 1 | 1 | 1 | 1 |
|---|---|---|---|

Enter your full name or your project ID-number (this number appears on your pad):

\_\_\_\_\_ 

|  |  |  |  |  |
|--|--|--|--|--|
|  |  |  |  |  |
|--|--|--|--|--|

Referral options:

- I have referred the patient to a cancer fast-track pathway
- I have referred the patient in the usual way to a hospital on cancer suspicion, but not directly to a cancer fast-track pathway
- I have referred the patient in the usual way to a hospital and did not suspect cancer
- The patient was admitted to hospital by emergency
- Suspicion of cancer was based on screening
- I have not been involved

Other \_\_\_\_\_ 

|  |  |
|--|--|
|  |  |
|--|--|

Enter the degree of certainty in your choice of cancer fast-track pathway:

- Totally certain
- Fairly certain
- Little uncertain
- Totally uncertain

Please elaborate \_\_\_\_\_ 

|  |  |
|--|--|
|  |  |
|--|--|

Insert the date of the day the patient first presented symptoms in general practice which according to your present knowledge raised your suspicion that the patient could have cancer:

day          month          year

|  |  |  |  |  |  |
|--|--|--|--|--|--|
|  |  |  |  |  |  |
|--|--|--|--|--|--|

What is the risk that this patient has cancer?

(0 % = no risk, 100 % = absolutely high risk)

|  |  |  |
|--|--|--|
|  |  |  |
|--|--|--|

I don't know

Insert the date of referral of your patient to a cancer fast-track pathway:

day            month        year

|  |  |  |  |  |  |
|--|--|--|--|--|--|
|  |  |  |  |  |  |
|--|--|--|--|--|--|

On which symptoms did you refer the patient?

Symptom 1: \_\_\_\_\_

|  |  |  |
|--|--|--|
|  |  |  |
|--|--|--|

Symptom 2: \_\_\_\_\_

|  |  |  |
|--|--|--|
|  |  |  |
|--|--|--|

Symptom 3: \_\_\_\_\_

|  |  |  |
|--|--|--|
|  |  |  |
|--|--|--|
