# Supplementary material for: A geographical cluster randomised stepped wedge study of continuing medical education and cancer diagnosis in general practice
Source: Springer Nature journal article supplement (doi:10.1186/s13012-014-0159-z), 2014-11-06
Supplement: MOESM1 [file 9772852]

**1. Your experience of referral to fast-track pathways**

For each of the following statements, please select the option that best reflects your view.

|                                                                       | strongly disagree | disagree | neither agree nor disagree | agree | strongly agree |
|-----------------------------------------------------------------------|-------------------|----------|----------------------------|-------|----------------|
| It is complicated to make a cancer fast-track referral                |                   |          |                            |       |                |
| The time it takes to make a cancer fast-track referral is appropriate |                   |          |                            |       |                |

|                                                                                                                           | never | rarely | sometimes | often | always |
|---------------------------------------------------------------------------------------------------------------------------|-------|--------|-----------|-------|--------|
| A patient-doctor consultation involving a cancer fast-track referral can be carried out within 15 minutes                 |       |        |           |       |        |
| I always provide the patient with written patient instructions when I make a cancer fast-track referral                   |       |        |           |       |        |
| I refer patients in the usual way to the hospital instead of using a cancer fast-track referral, even if I suspect cancer |       |        |           |       |        |
| I use information from the online cancer guideline for general practitioners when I make a cancer fast-track referral     |       |        |           |       |        |

**2. Your attitude towards cancer diagnosis and your consideration**

For each of the following statements, please select the option that best reflects your view.

|                                                                                                                                                                                        | strongly disagree | disagree | neither agree nor disagree | agree | strongly agree |
|----------------------------------------------------------------------------------------------------------------------------------------------------------------------------------------|-------------------|----------|----------------------------|-------|----------------|
| I consider it overuse of health care resources if I have referred a patient to a cancer fast-track pathway and the patient turns out not to have cancer                                |                   |          |                            |       |                |
| I think that I subject the patients to unnecessary distress if I refer the patient to a cancer fast-track pathway and the patient turns out not to have cancer                         |                   |          |                            |       |                |
| The more patients of those I refer to a cancer fast-track pathway are diagnosed with cancer, the better a doctor I am                                                                  |                   |          |                            |       |                |
| I am a good doctor when I can refer a patient to a cancer fast-track pathway based on a reasonable suspicion and thus am able to quickly clarify whether the patient has cancer or not |                   |          |                            |       |                |
| I hesitate to order test when I risk to over-diagnose                                                                                                                                  |                   |          |                            |       |                |

### 3. Your experience with communication about cancer suspicion

For each of the following statements, please select the option that best reflects your view.

|                                                                                             | strongly disagree | disagree | neither agree nor disagree | agree | strongly agree |
|---------------------------------------------------------------------------------------------|-------------------|----------|----------------------------|-------|----------------|
| It's difficult to mention risk of cancer to a patient with alarm symptoms.                  |                   |          |                            |       |                |
| I feel well-equipped to communicate with the coordinators of the cancer fast-track pathway. |                   |          |                            |       |                |

### 4. The following questions are about probabilities

Enter for each question a percentage of your best estimate

|                                                                                                                                                                                                                                   | percentage |
|-----------------------------------------------------------------------------------------------------------------------------------------------------------------------------------------------------------------------------------|------------|
| In your estimation, what is the likelihood that a 50-year-old patient having cancer at the time you chose to refer the patient to a cancer fast track pathway?<br>Enter a percentage (0-100 %): _____ %                           |            |
| In your estimation, what is the likelihood of a patient, smoker, aged 40 and above having lung cancer the second time the patient presents hemoptysis in your practice?<br>Enter a percentage (0-100 %): _____ %                  |            |
| In your estimation, what is the probability that a patient aged 40 and above having colorectal cancer the first time the patient presents constipation and weight loss in your practice?<br>Enter a percentage (0-100 %): _____ % |            |
| In your estimation, what is the risk for a lung cancer not being detected on a chest x-ray at the time of diagnosis?<br>Enter a percentage (0-100 %): _____ %                                                                     |            |
| In your estimation, what is the proportion of patients with colorectal cancer who do present themselves with an alarm symptom?<br>Enter a percentage (0-100 %): _____ %                                                           |            |
| In your estimation, what is the proportion of patients with ovarian cancer not being detected by doing a gynecological examination in general practice at the time of diagnosis?<br>Enter a percentage (0-100 %): _____ %         |            |
