# Supplementary material for: A geographical cluster randomised stepped wedge study of continuing medical education and cancer diagnosis in general practice
Source: Springer Nature journal article supplement (doi:10.1186/s13012-014-0159-z), 2014-11-06
Supplement: MOESM2 [file 9772852]

Additional file 2: One-page form. The GP was requested to complete a form each time the GP referred a patient to a cancer fast-track pathway

Please complete this form each time you refer a patient to a cancer fast-track pathway

Insert the date of referral of your patient to a cancer fast-track pathway:

day            month        year

|  |  |  |  |  |  |
|--|--|--|--|--|--|
|  |  |  |  |  |  |
|--|--|--|--|--|--|

Enter your patient's personal identification number:

day            month        year            xxxx

|  |  |  |  |  |  |  |  |  |  |
|--|--|--|--|--|--|--|--|--|--|
|  |  |  |  |  |  |  |  |  |  |
|--|--|--|--|--|--|--|--|--|--|

Enter the type of cancer fast-track pathway the patient is referred to:

\_\_\_\_\_ 

|  |  |
|--|--|
|  |  |
|--|--|

Enter your degree of certainty in your choice of which cancer fast-track pathway you referred the patient to:

- Totally certain  
 Fairly certain  
 Little uncertain  
 Totally uncertain

Please elaborate \_\_\_\_\_ 

|  |  |
|--|--|
|  |  |
|--|--|

On which symptoms did you refer the patients?

Symptom 1: \_\_\_\_\_ 

|  |  |  |  |
|--|--|--|--|
|  |  |  |  |
|--|--|--|--|

Symptom 2: \_\_\_\_\_ 

|  |  |  |  |
|--|--|--|--|
|  |  |  |  |
|--|--|--|--|

Symptom 3: \_\_\_\_\_ 

|  |  |  |  |
|--|--|--|--|
|  |  |  |  |
|--|--|--|--|

Insert the date of the day the patient first presented symptoms in general practice which according to your present knowledge raised your suspicion that the patient could have cancer:

day            month        year

|  |  |  |  |  |  |
|--|--|--|--|--|--|
|  |  |  |  |  |  |
|--|--|--|--|--|--|

What is the risk for this patient having cancer?

(0 % = no risk, 100 % = absolutely certain)

|  |  |  |  |
|--|--|--|--|
|  |  |  |  |
|--|--|--|--|

 I don't know
