# Supplementary figures and images for: A geographical cluster randomised stepped wedge study of continuing medical education and cancer diagnosis in general practice
Source: Springer Nature journal article supplement (doi:10.1186/s13012-014-0159-z), 2014-11-06

Figure 1

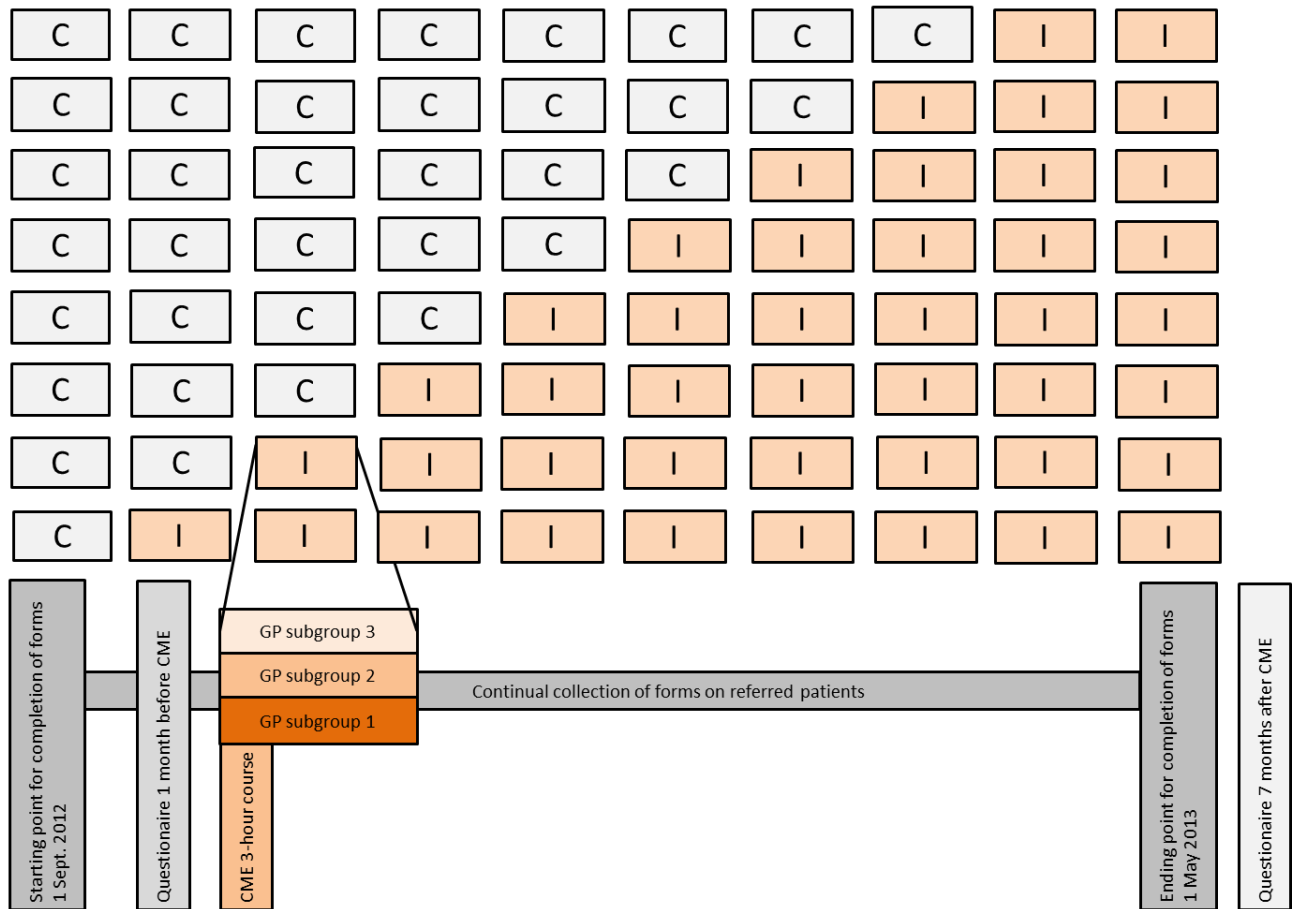

Supplement: MOESM8 [file 9772852]

Figure 2

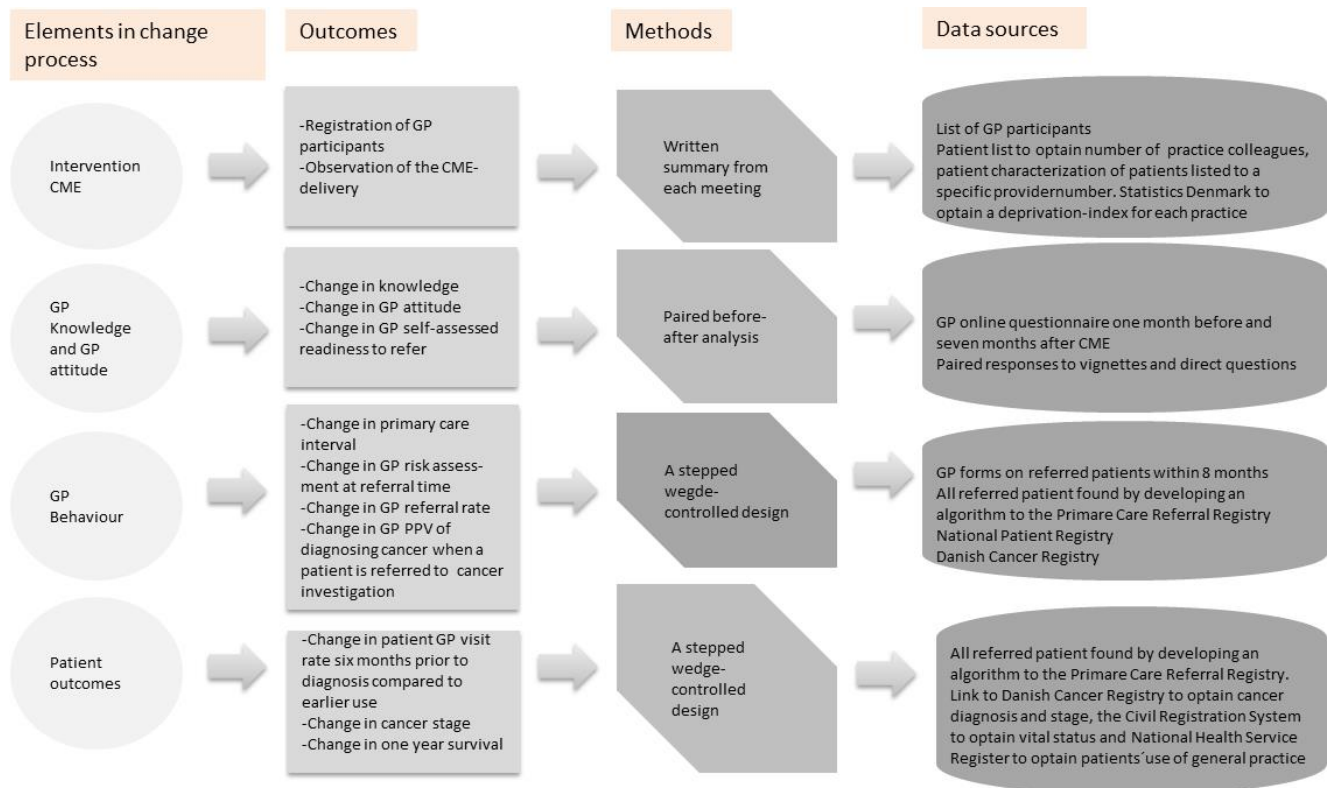

Supplement: MOESM9 [file 9772852]
